# Supplementary material
Source: HighWire-hosted journal article supplement (https://erj.ersjournals.com/content/50/2/1700740)
Supplement: inline-supplementary-material-1 [file inline-supplementary-material-1.pdf]

## **Online Supplement**

### **Mortality in Pulmonary Arterial Hypertension: Prediction by the 2015 European Pulmonary Hypertension Guidelines Risk Stratification Model**

**Supplementary Figure S1** Kaplan-Meier survival estimates of patients with all forms of PAH combined per individual risk stratification at baseline (analysis included only patients for whom all selected variables were available).

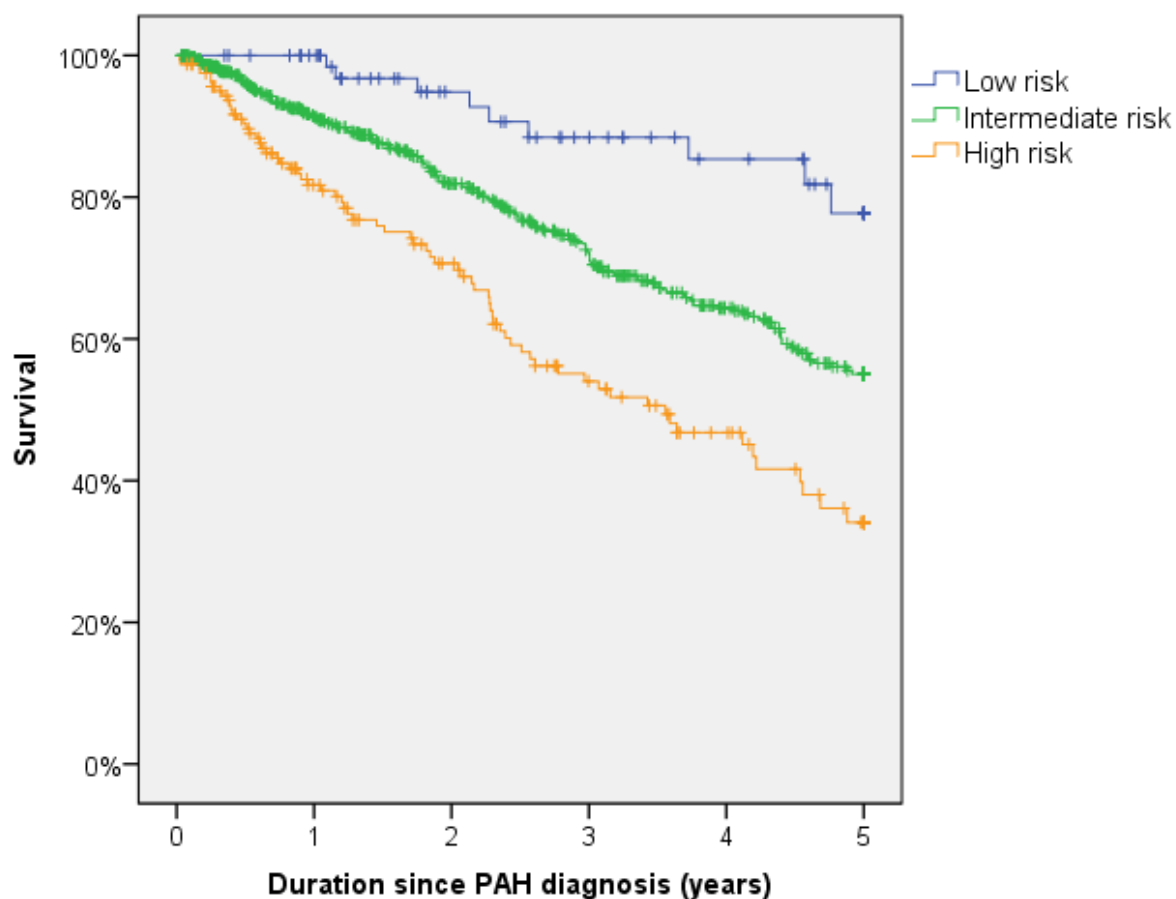

| Years after enrolment | Survival |                   |           | Number at risk |                   |           |
|-----------------------|----------|-------------------|-----------|----------------|-------------------|-----------|
|                       | Low risk | Intermediate risk | High risk | Low risk       | Intermediate risk | High risk |
| 0                     | 100.0%   | 100.0%            | 100.0%    | 75             | 642               | 162       |
| 1                     | 100.0%   | 91.3%             | 81.7%     | 65             | 445               | 103       |
| 2                     | 94.9%    | 81.9%             | 70.7%     | 45             | 328               | 77        |
| 3                     | 88.4%    | 72.0%             | 54.0%     | 35             | 239               | 49        |
| 4                     | 85.4%    | 64.4%             | 46.8%     | 27             | 166               | 31        |
| 5                     | 77.7%    | 55.0%             | 34.1%     | 19             | 106               | 16        |

**Supplementary Figure S2** Kaplan-Meier survival estimates of patients with idiopathic, drug-associated or hereditary PAH per individual risk stratification at baseline.

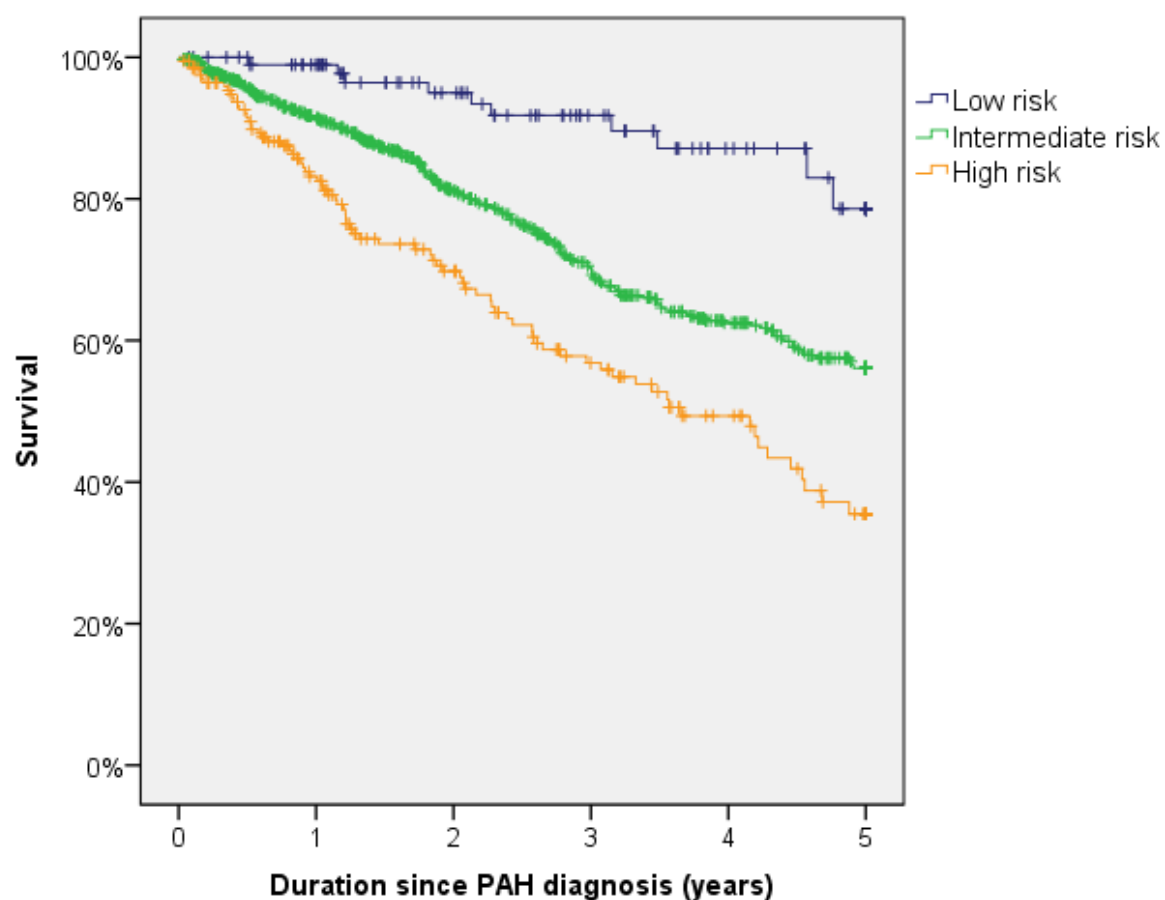

| Years after enrolment | Survival |                   |           | Number at risk |                   |           |
|-----------------------|----------|-------------------|-----------|----------------|-------------------|-----------|
|                       | Low risk | Intermediate risk | High risk | Low risk       | Intermediate risk | High risk |
| 0                     | 100.0%   | 100.0%            | 100.0%    | 101            | 760               | 199       |
| 1                     | 98.9%    | 91.4%             | 83.2%     | 86             | 545               | 130       |
| 2                     | 95.0%    | 81.3%             | 69.8%     | 64             | 381               | 88        |
| 3                     | 91.8%    | 70.0%             | 56.8%     | 44             | 272               | 59        |
| 4                     | 87.1%    | 62.5%             | 49.3%     | 27             | 186               | 37        |
| 5                     | 78.6%    | 56.1%             | 35.5%     | 16             | 118               | 19        |

**Supplementary Figure S3** Kaplan-Meier survival estimates of patients with connective tissue disease-associated PAH per individual risk stratification at baseline.

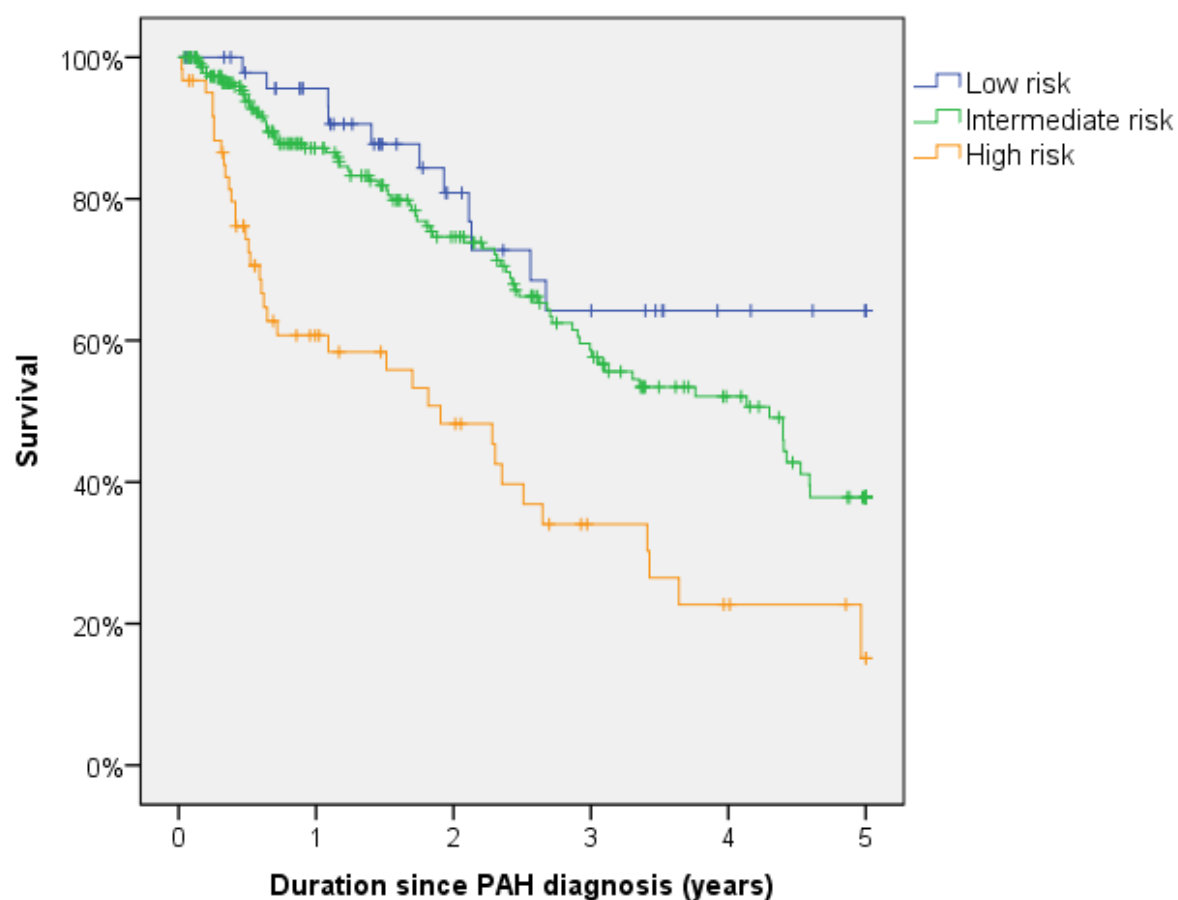

| Years after enrolment | Survival |                   |           | Number at risk |                   |           |
|-----------------------|----------|-------------------|-----------|----------------|-------------------|-----------|
|                       | Low risk | Intermediate risk | High risk | Low risk       | Intermediate risk | High risk |
| 0                     | 100.0%   | 100.0%            | 100.0%    | 52             | 234               | 61        |
| 1                     | 95.6%    | 87.2%             | 60.7%     | 38             | 138               | 27        |
| 2                     | 80.9%    | 74.6%             | 48.2%     | 21             | 97                | 19        |
| 3                     | 64.2%    | 58.6%             | 34.0%     | 15             | 61                | 9         |
| 4                     | 64.2%    | 52.1%             | 22.7%     | 9              | 37                | 5         |
| 5                     | 64.2%    | 37.8%             | 15.1%     | 7              | 19                | 2         |

**Supplementary Figure S4** Flow chart showing the number of patients lost between baseline and follow-up

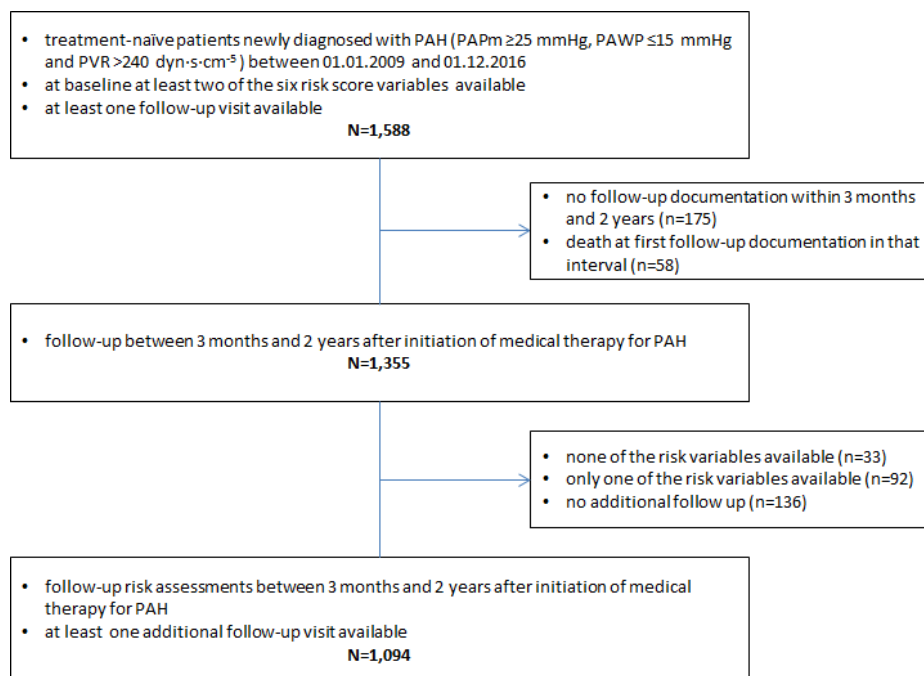

**Supplementary Figure S5** Kaplan-Meier survival estimates of patients with idiopathic, drug-associated or hereditary PAH per individual risk stratification at follow-up.

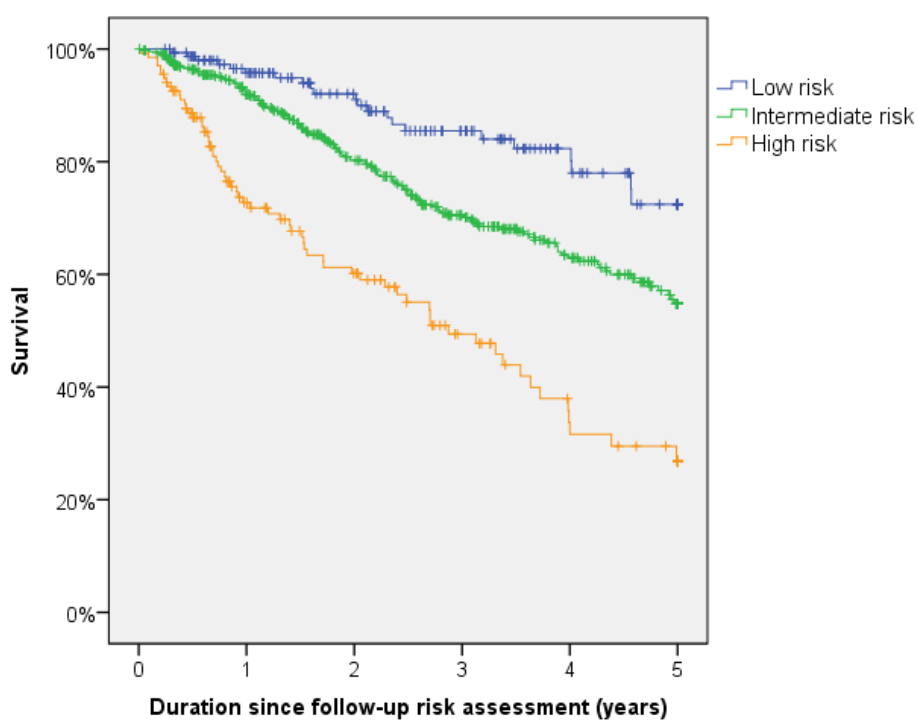

| Years after enrolment | Survival |                   |           | Number of cases left |                   |           |
|-----------------------|----------|-------------------|-----------|----------------------|-------------------|-----------|
|                       | Low risk | Intermediate risk | High risk | Low risk             | Intermediate risk | High risk |
| <b>0</b>              | 100.0%   | 100.0%            | 100.0%    | 158                  | 460               | 138       |
| <b>1</b>              | 95.7%    | 91.9%             | 72.8%     | 124                  | 358               | 76        |
| <b>2</b>              | 92.1%    | 80.2%             | 60.2%     | 90                   | 259               | 55        |
| <b>3</b>              | 85.5%    | 70.5%             | 49.4%     | 62                   | 180               | 30        |
| <b>4</b>              | 82.3%    | 62.9%             | 31.6%     | 38                   | 117               | 15        |
| <b>5</b>              | 72.4%    | 54.8%             | 26.8%     | 22                   | 65                | 10        |

**Supplementary Figure S6** Kaplan-Meier survival estimates of patients with connective tissue disease-associated PAH per individual risk stratification at follow-up.

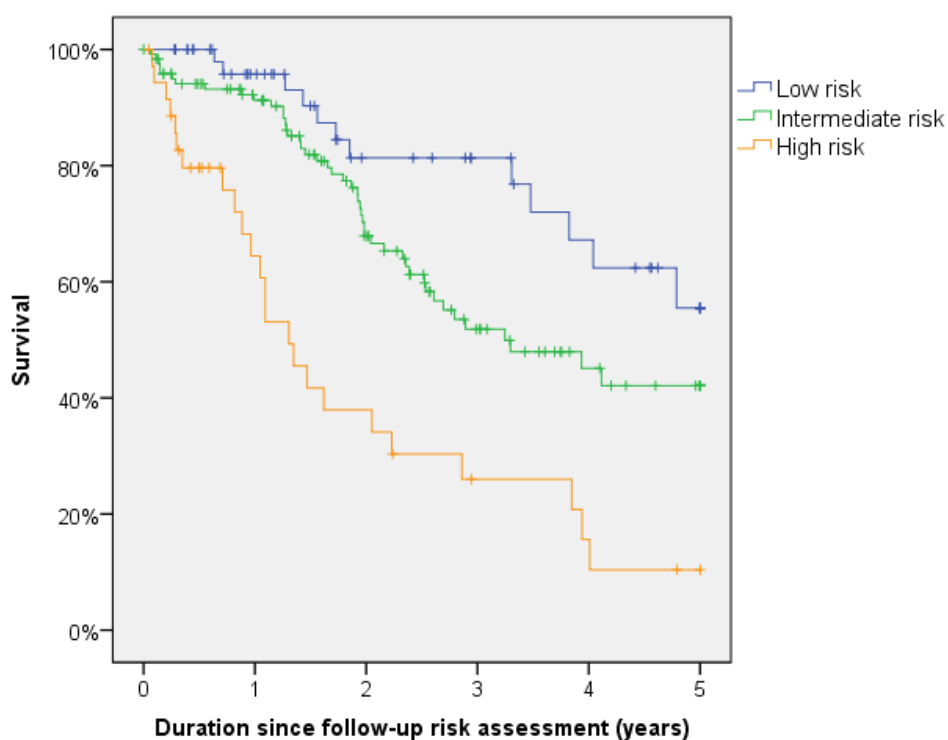

| Years after enrolment | Survival |                   |           | Number of cases left |                   |           |
|-----------------------|----------|-------------------|-----------|----------------------|-------------------|-----------|
|                       | Low risk | Intermediate risk | High risk | Low risk             | Intermediate risk | High risk |
| 0                     | 100.0%   | 100.0%            | 100.0%    | 55                   | 122               | 36        |
| 1                     | 95.7%    | 91.2%             | 64.4%     | 40                   | 93                | 17        |
| 2                     | 81.3%    | 67.9%             | 37.9%     | 24                   | 56                | 10        |
| 3                     | 81.3%    | 51.9%             | 26.0%     | 19                   | 30                | 5         |
| 4                     | 67.2%    | 45.1%             | 15.6%     | 14                   | 16                | 3         |
| 5                     | 55.5%    | 42.1%             | 10.4%     | 8                    | 10                | 1         |

**Supplementary Table S1** Characteristics of the patients included into the baseline risk stratification group (analysis included only patients for whom all selected variables were available)

|                                          | Low risk<br>n=75    | Intermediate<br>risk<br>n=642 | High risk<br>n=162      | All<br>n=879          |
|------------------------------------------|---------------------|-------------------------------|-------------------------|-----------------------|
| Age (years)                              | 51 ± 18             | 67 ± 14                       | 66 ± 16                 | 65 ± 15               |
| Female                                   | 60%                 | 65%                           | 65%                     | 65%                   |
| BMI (kg/m <sup>2</sup> )                 | 26 ± 6              | 28 ± 7                        | 28 ± 7                  | 28 ± 7                |
| PAH Aetiology (n; %)                     |                     |                               |                         |                       |
| I/D/H-PAH                                | 39 (52%)            | 455 (71%)                     | 119 (73%)               | 613 (70%)             |
| CTD-PAH                                  | 22 (29%)            | 128 (20%)                     | 34 (21%)                | 184 (21%)             |
| HIV-PAH                                  | 3 (4%)              | 4 (1%)                        | 1 (0%)                  | 8 (1%)                |
| PoPH                                     | 5 (7%)              | 30 (5%)                       | 7 (4%)                  | 42 (5%)               |
| CHD-PAH                                  | 6 (8%)              | 25 (4%)                       | 1 (0%)                  | 32 (4%)               |
| WHO FC Class<br>I/II/III/IV              | 1%, 55%, 44%,<br>0% | 0%, 7%, 81%,<br>12%           | 0%, 1%, 58%,<br>41%     | 0%, 10%, 74%,<br>16%  |
| 6MWD (m)                                 | 470 ± 85            | 299 ± 107                     | 187 ± 103               | 293 ± 126             |
| NT-pro BNP<br>(ng/L), median<br>(Q1; Q3) | 178 (75; 351)       | 1,351 (614;<br>2,825)         | 3,923 (2,488;<br>6,103) | 1,510 (560;<br>3,381) |
| BNP (ng/L),<br>median (Q1; Q3)           | 34 (9; 99)          | 182 (96; 334)                 | 518 (380; 736)          | 223 (101; 438)        |
| Haemodynamics                            |                     |                               |                         |                       |
| RA pressure<br>(mmHg)                    | 5 ± 3               | 8 ± 5                         | 13 ± 5                  | 8 ± 5                 |



|                                                   |           |           |             |           |
|---------------------------------------------------|-----------|-----------|-------------|-----------|
| PAPm (mmHg)                                       | 41 ± 14   | 42 ± 12   | 49 ± 12     | 43 ± 12   |
| PAWP (mmHg)                                       | 8 ± 3     | 9 ± 4     | 10 ± 3      | 9 ± 3     |
| CI (l/min/m <sup>2</sup> )                        | 3.0 ± 0.8 | 2.2 ± 0.7 | 1.6 ± 0.4   | 2.2 ± 0.8 |
| PVR (dyn·s·cm <sup>-5</sup> )                     | 515 ± 272 | 714 ± 374 | 1,156 ± 560 | 779 ± 448 |
| SvO <sub>2</sub>                                  | 72 ± 4    | 65 ± 7    | 54 ± 7      | 63 ± 9    |
| Initial therapy (within 3 months after diagnosis) |           |           |             |           |
| ERA                                               | 51%       | 34%       | 40%         | 36%       |
| PDE5i/sGCs                                        | 59%       | 73%       | 74%         | 72%       |
| SC/IV PCA                                         | 1%        | 0%        | 1%          | 4%        |
| Monotherapy                                       | 81%       | 90%       |             | 88%       |
| Combination therapy                               | 19%       | 11%       | 18%         | 12%       |
| Anticoagulation                                   | 27%       | 49%       | 54%         | 48%       |

Categorical data are shown as n and % of the respective population. Continuous data are depicted as mean ± SD unless stated otherwise.

Abbreviations: BMI, body mass index; PAH, pulmonary arterial hypertension; I/D/H-PAH, idiopathic, drug-associated or hereditary PAH; CTD, connective tissue disease; HIV, human immunodeficiency virus; PoPH, portopulmonary hypertension; CHD, congenital heart disease; WHO FC, World Health Organization Functional Class; 6MWD, 6-minute walking distance; BNP, brain natriuretic peptide; NT-proBNP, N-terminal fragment of pro-brain natriuretic peptide; RA, right atrial; PAPm, mean pulmonary arterial pressure; PAWP, pulmonary arterial wedge pressure; CI, cardiac index; PVR, pulmonary vascular resistance; SvO<sub>2</sub>, mixed-venous oxygen saturation; ERA endothelin receptor antagonists; PDE5i, phosphodiesterase-5 inhibitors; sGCs, stimulator of soluble guanylate cyclase; PCA, prostacyclin analogues

**Supplementary Table S2** Characteristics of the patients with idiopathic, drug-associated or hereditary PAH included into the baseline risk stratification group

|                                                   | Low risk<br>n=101                    | Intermediate<br>risk<br>n=760        | High risk<br>n=199                   | All<br>n=1,060                        |
|---------------------------------------------------|--------------------------------------|--------------------------------------|--------------------------------------|---------------------------------------|
| Age (years)                                       | 50 ± 20                              | 67 ± 14                              | 66 ± 17                              | 65 ± 16                               |
| Female                                            | 70%                                  | 60%                                  | 64%                                  | 61%                                   |
| BMI (kg/m <sup>2</sup> )                          | 26 ± 6                               | 29 ± 7                               | 28 ± 7                               | 28 ± 7                                |
| WHO FC Class<br>I/II/III/IV<br>N=1,021            | 2%, 54%, 37%,<br>0% (unknown,<br>8%) | 0%, 7%, 78%,<br>11% (unknown,<br>3%) | 0%, 1%, 53%,<br>43% (unknown,<br>3%) | 0%, 10%, 70%,<br>16% (unknown,<br>4%) |
| 6MWD (m)<br>N=846                                 | 459 ± 99                             | 304 ± 104                            | 187 ± 101                            | 299 ± 123                             |
| NT-pro BNP<br>(ng/L); median<br>(Q1; Q3)<br>N=685 | 148 (92; 341)                        | 1,401 (614;<br>2,924)                | 3,982 (2,453;<br>6,188)              | 1,629 (573;<br>3,581)                 |
| BNP (ng/L);<br>median (Q1;<br>Q3); N=189          | 54 (28; 99)                          | 175 (90; 348)                        | 523 (380; 784)                       | 232 (102; 489)                        |
| Haemodynamics                                     |                                      |                                      |                                      |                                       |
| RA pressure<br>(mmHg)<br>N=1,008                  | 5 ± 3                                | 8 ± 4                                | 13 ± 5                               | 8 ± 5                                 |
| PAPm (mmHg)<br>N=1,060                            | 44 ± 14                              | 43 ± 12                              | 50 ± 12                              | 45 ± 13                               |
| PAWP (mmHg)                                       | 8 ± 3                                | 9 ± 4                                | 10 ± 3                               | 9 ± 3                                 |

|                                                   |           |           |             |           |
|---------------------------------------------------|-----------|-----------|-------------|-----------|
| N=1,060                                           |           |           |             |           |
| CI (l/min/m <sup>2</sup> )<br>N=1,001             | 3.0 ± 0.6 | 2.2 ± 0.7 | 1.6 ± 0.4   | 2.2 ± 0.7 |
| PVR (dyn·s·cm <sup>-5</sup> )<br>N=1,060          | 590 ± 314 | 744 ± 381 | 1,140 ± 472 | 804 ± 428 |
| SvO <sub>2</sub><br>N=951                         | 72 ± 5    | 64 ± 8    | 53 ± 8      | 62 ± 9    |
| Initial therapy (within 3 months after diagnosis) |           |           |             |           |
| ERA                                               | 42%       | 31%       | 41%         | 34%       |
| PDE5i/sGCs                                        | 66%       | 76%       | 82%         | 76%       |
| SC/IV PCA                                         | 1%        | 2%        | 8%          | 3%        |
| Monotherapy                                       | 80%       | 89%       | 71%         | 85%       |
| Combination therapy                               | 20%       | 11%       | 29%         | 15%       |
| Anticoagulation                                   | 45%       | 54%       | 60%         | 54%       |

Categorical data are shown as n and % of the respective population. Continuous data are depicted as mean ± SD unless stated otherwise.

Abbreviations: BMI, body mass index; PAH, pulmonary arterial hypertension; WHO FC, World Health Organization Functional Class; 6MWD, 6-minute walk distance; BNP, brain natriuretic peptide; NT-proBNP, N-terminal fragment of pro-brain natriuretic peptide; RA, right atrial; PAPm, mean pulmonary arterial pressure; PAWP, pulmonary arterial wedge pressure; CI, cardiac index; PVR, pulmonary vascular resistance; SvO<sub>2</sub>, mixed-venous oxygen saturation; ERA endothelin receptor antagonists; PDE5i, phosphodiesterase-5 inhibitors; sGCs, stimulator of soluble guanylate cyclase; PCA, prostacyclin analogues

**Supplementary Table S3** Characteristics of the patients with connective tissue disease-associated PAH included into the baseline risk stratification group

|                                                   | Low risk<br>n=52                     | Intermediate<br>risk<br>n=234       | High risk<br>n=61                    | All<br>n=347                          |
|---------------------------------------------------|--------------------------------------|-------------------------------------|--------------------------------------|---------------------------------------|
| Age (years)                                       | 62 ± 12                              | 67 ± 13                             | 67 ± 16                              | 66 ± 13                               |
| Female                                            | 75%                                  | 79%                                 | 77%                                  | 78%                                   |
| BMI (kg/m <sup>2</sup> )                          | 26 ± 5                               | 27 ± 5                              | 26 ± 6                               | 26 ± 5                                |
| Aetiology (n)                                     |                                      |                                     |                                      |                                       |
| SSc                                               | 41                                   | 139                                 | 36                                   | 216                                   |
| SLE                                               | 2                                    | 17                                  | 2                                    | 21                                    |
| MCTD                                              | 2                                    | 14                                  | 5                                    | 21                                    |
| Others                                            | 7                                    | 64                                  | 18                                   | 89                                    |
| WHO FC Class<br>I/II/III/IV<br>N=334              | 0%, 42%, 50%,<br>0% (unknown,<br>8%) | 0%, 6%, 81%,<br>9% (unknown,<br>3%) | 0%, 2%, 51%,<br>44%, (unknown<br>3%) | 0%, 11%, 71%,<br>14% (unknown,<br>4%) |
| 6MWD (m)<br>N=273                                 | 408 ± 100                            | 267 ± 116                           | 173 ± 107                            | 273 ± 130                             |
| NT-pro BNP<br>(ng/L); median<br>(Q1; Q3)<br>N=217 | 195 (104; 410)                       | 1,952 (747;<br>3,766)               | 4,420 (3,046;<br>10,070)             | 1,958 (563;<br>3,994)                 |
| BNP (ng/L);<br>median (Q1;<br>Q3)<br>N=37         | 58 (23; 92)                          | 330 (78; 560)                       | 642 (432; 926)                       | 437 (100; 637)                        |

| Haemodynamics                                     |           |           |             |           |
|---------------------------------------------------|-----------|-----------|-------------|-----------|
| RA pressure<br>(mmHg)<br>N=326                    | 5 ± 3     | 7 ± 5     | 13 ± 4      | 8 ± 5     |
| PAPm (mmHg)<br>N=347                              | 35 ± 11   | 43 ± 11   | 48 ± 10     | 42 ± 11   |
| PAWP (mmHg)<br>N=347                              | 8 ± 3     | 9 ± 3     | 10 ± 3      | 9 ± 3     |
| CI (l/min/m <sup>2</sup> )<br>N=325               | 3.1 ± 0.8 | 2.4 ± 0.6 | 1.7 ± 0.4   | 2.4 ± 0.7 |
| PVR (dyn·s·cm <sup>-5</sup> )<br>N=347            | 454 ± 201 | 686 ± 318 | 1,067 ± 365 | 718 ± 360 |
| SvO <sub>2</sub><br>N=309                         | 72 ± 4    | 64 ± 7    | 53 ± 7      | 63 ± 9    |
| Initial therapy (within 3 months after diagnosis) |           |           |             |           |
| ERA                                               | 50%       | 47%       | 56%         | 49%       |
| PDE5i/sGCs                                        | 54%       | 64%       | 63%         | 62%       |
| SC/IV PCA                                         | 0%        | 2%        | 3%          | 2%        |
| Monotherapy                                       | 92%       | 85%       | 79%         | 85%       |
| Combination<br>therapy                            | 8%        | 15%       | 21%         | 15%       |
| Anticoagulation                                   | 15%       | 35%       | 31%         | 31%       |

Categorical data are shown as n and % of the respective population. Continuous data are depicted as mean ± SD unless stated otherwise.

Abbreviations: BMI, body mass index; PAH, pulmonary arterial hypertension; SSc, systemic sclerosis; SLE, systemic lupus erythematosus; MCTD; mixed connective tissue disease; WHO FC, World Health Organization Functional Class; 6MWD, 6-minute walk distance; BNP, brain natriuretic peptide; NT-proBNP, N-terminal fragment of pro-brain natriuretic peptide; RA, right atrial; PAPm, mean pulmonary arterial pressure; PAWP, pulmonary arterial wedge pressure; CI, cardiac index; PVR, pulmonary vascular resistance; SvO<sub>2</sub>, mixed-venous oxygen saturation; ERA endothelin receptor antagonists; PDE5i, phosphodiesterase-5 inhibitors; sGCs, stimulator of soluble guanylate cyclase; PCA, prostacyclin analogues
